# Supplementary figures and images for: Beyond interpolation: integration of data and AI-extracted knowledge for high-entropy alloy discovery
Source: Royal Society of Chemistry journal article supplement (doi:10.1039/d5dd00400d), 2025-12-19

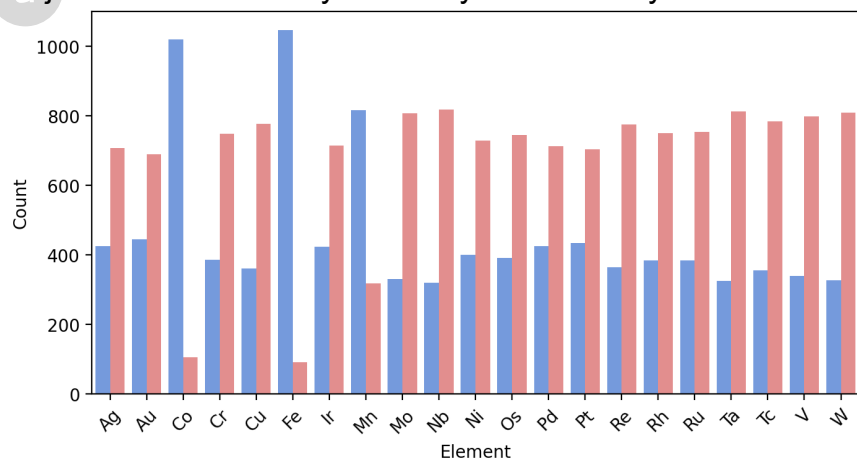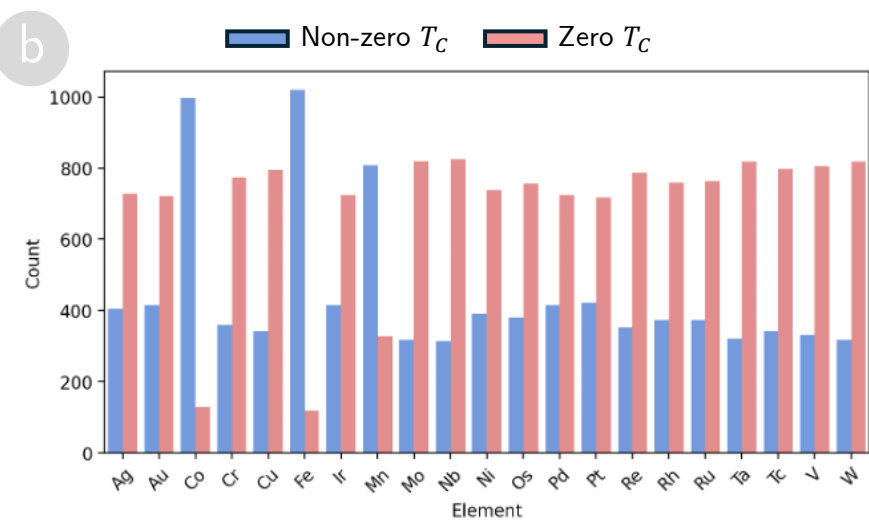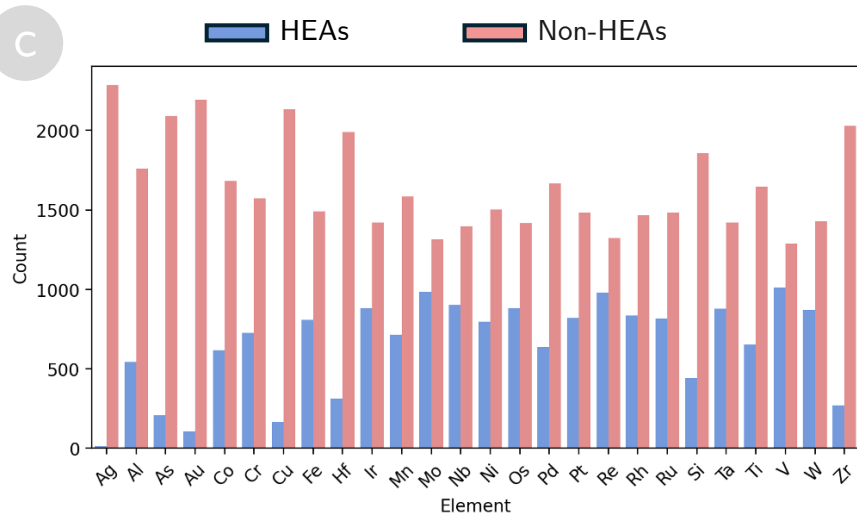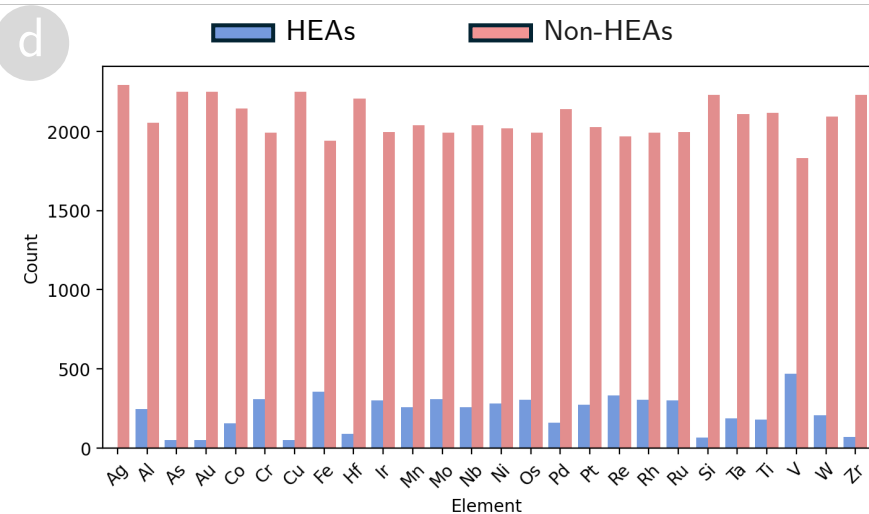

Supplement: d5dd00400d1.pdf [file d5dd00400d1.pdf]

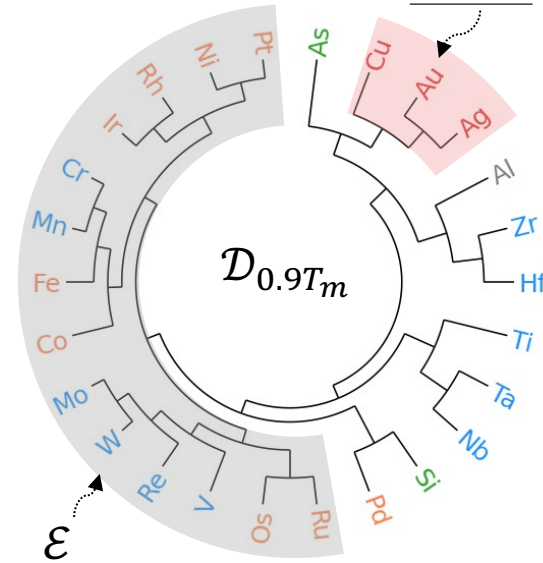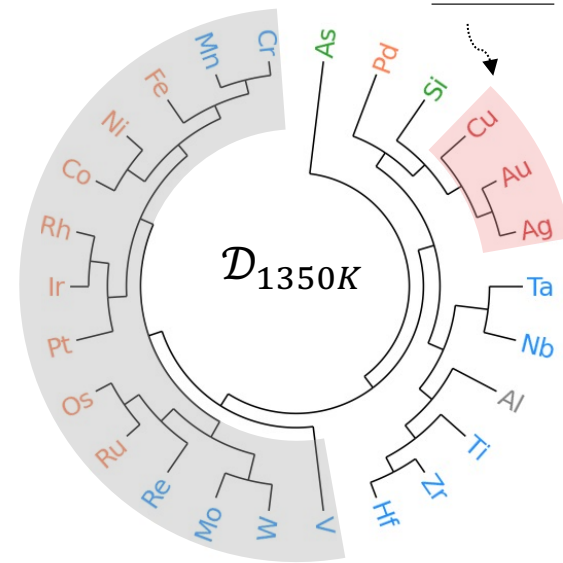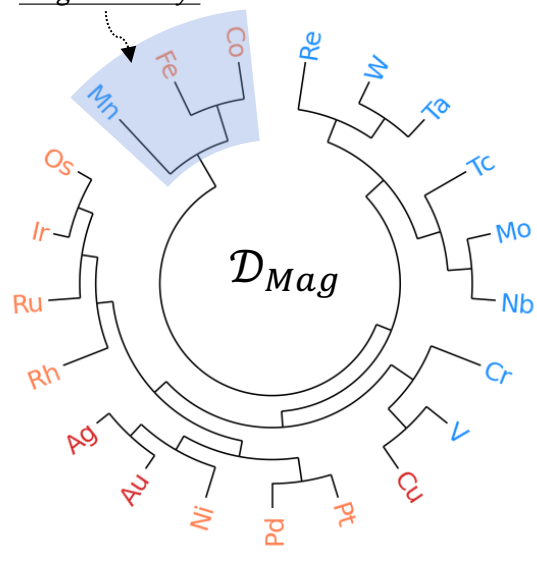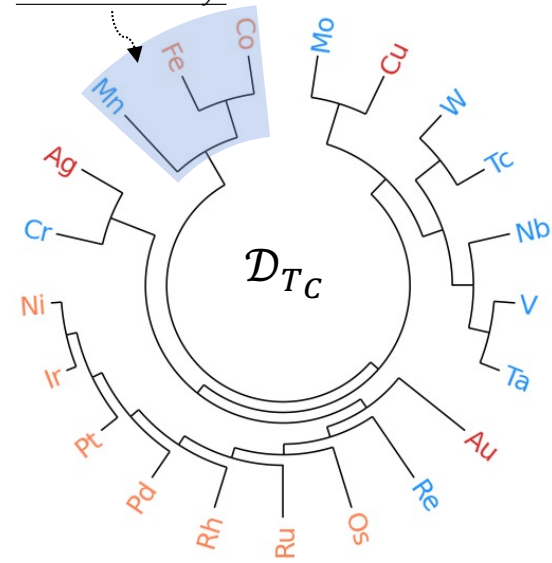

Supplement: d5dd00400d3.pdf [file d5dd00400d3.pdf]

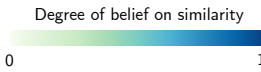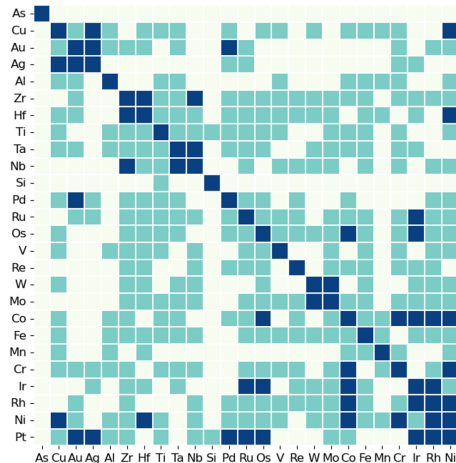

Corrosion

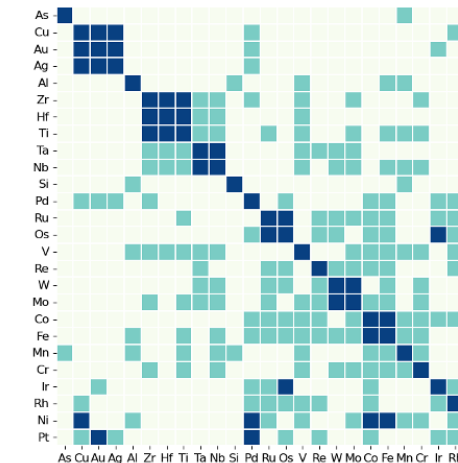

Materials

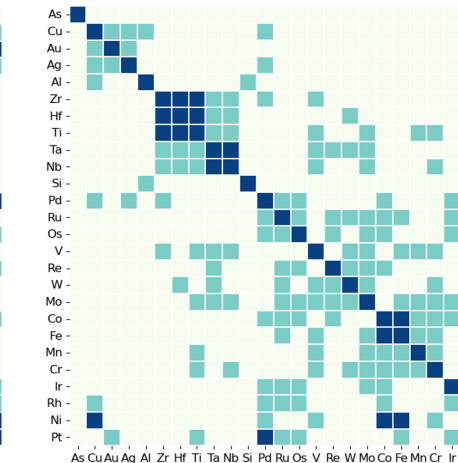

Mechanical

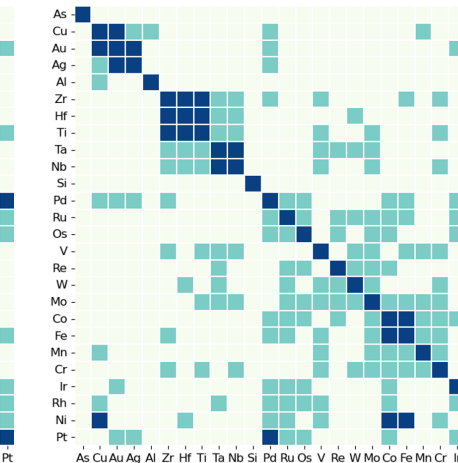

Solid-state

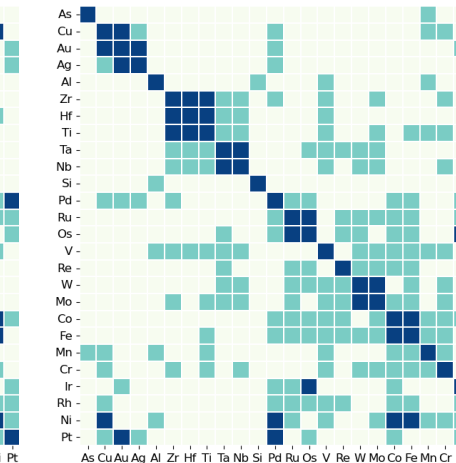

Metallurgist

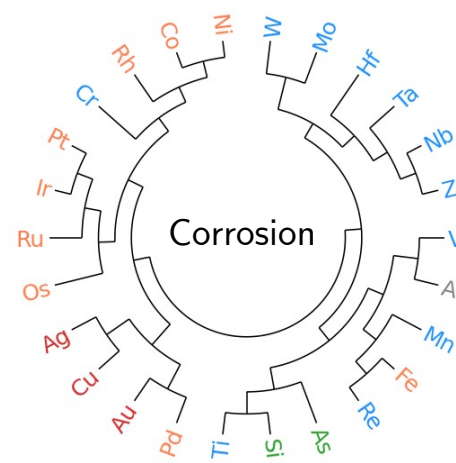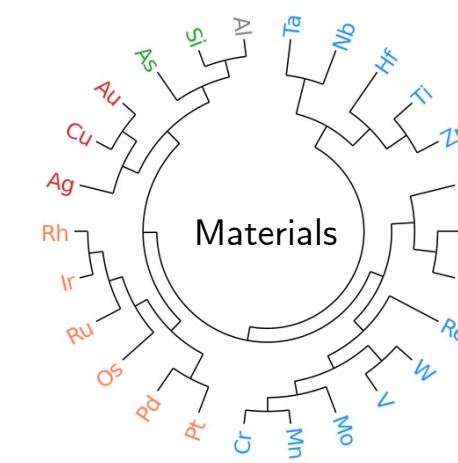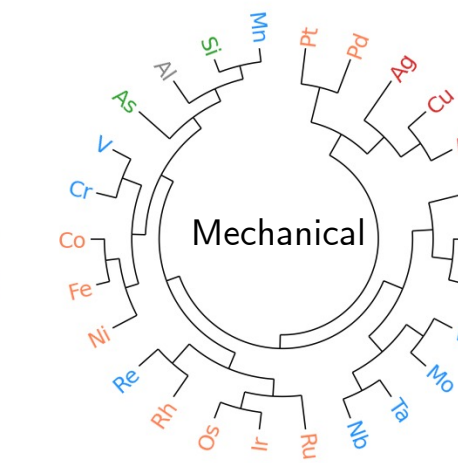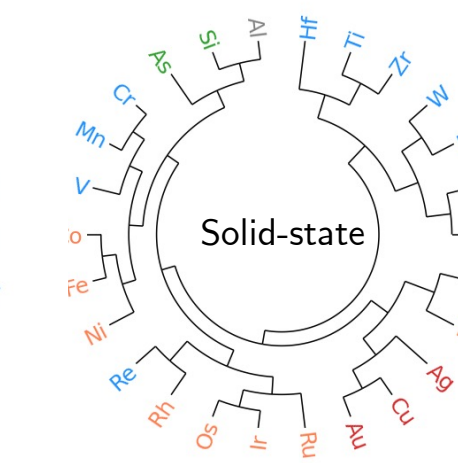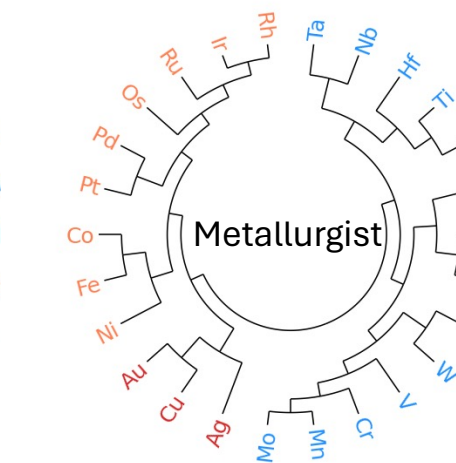

Supplement: d5dd00400d4.pdf [file d5dd00400d4.pdf]

Embedding space 2

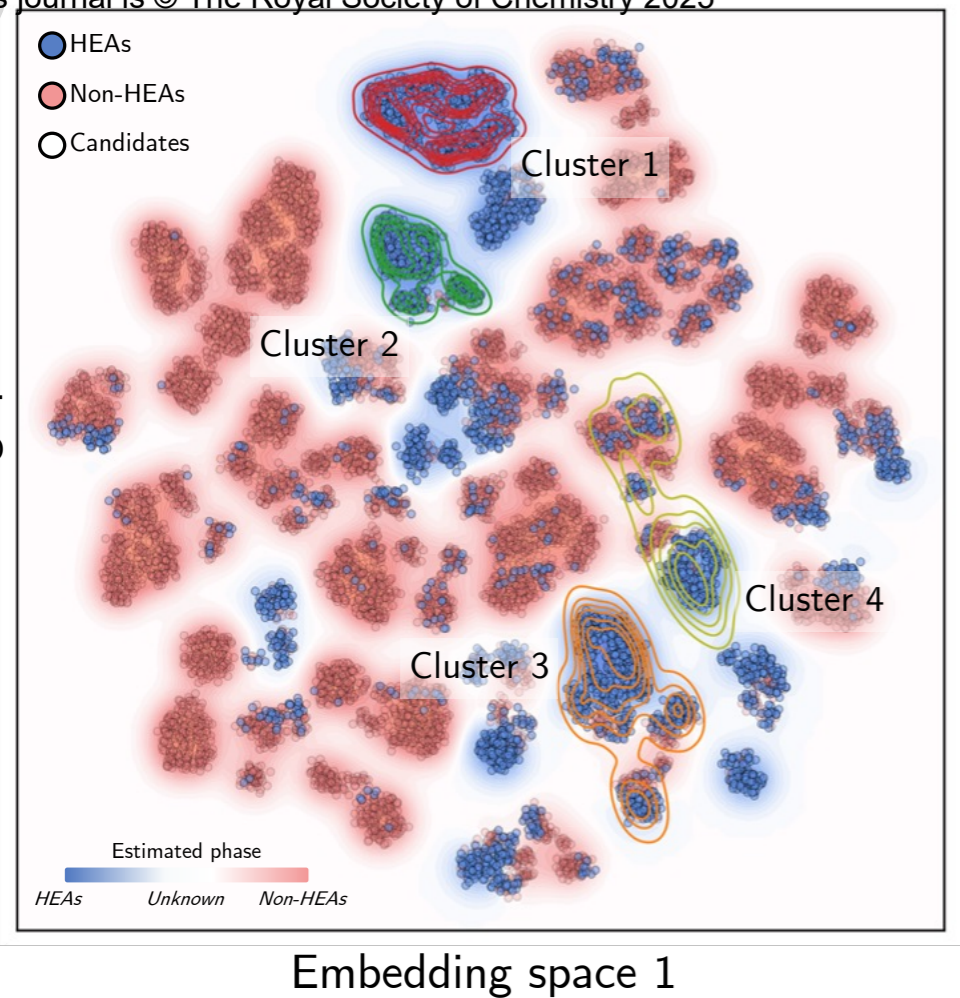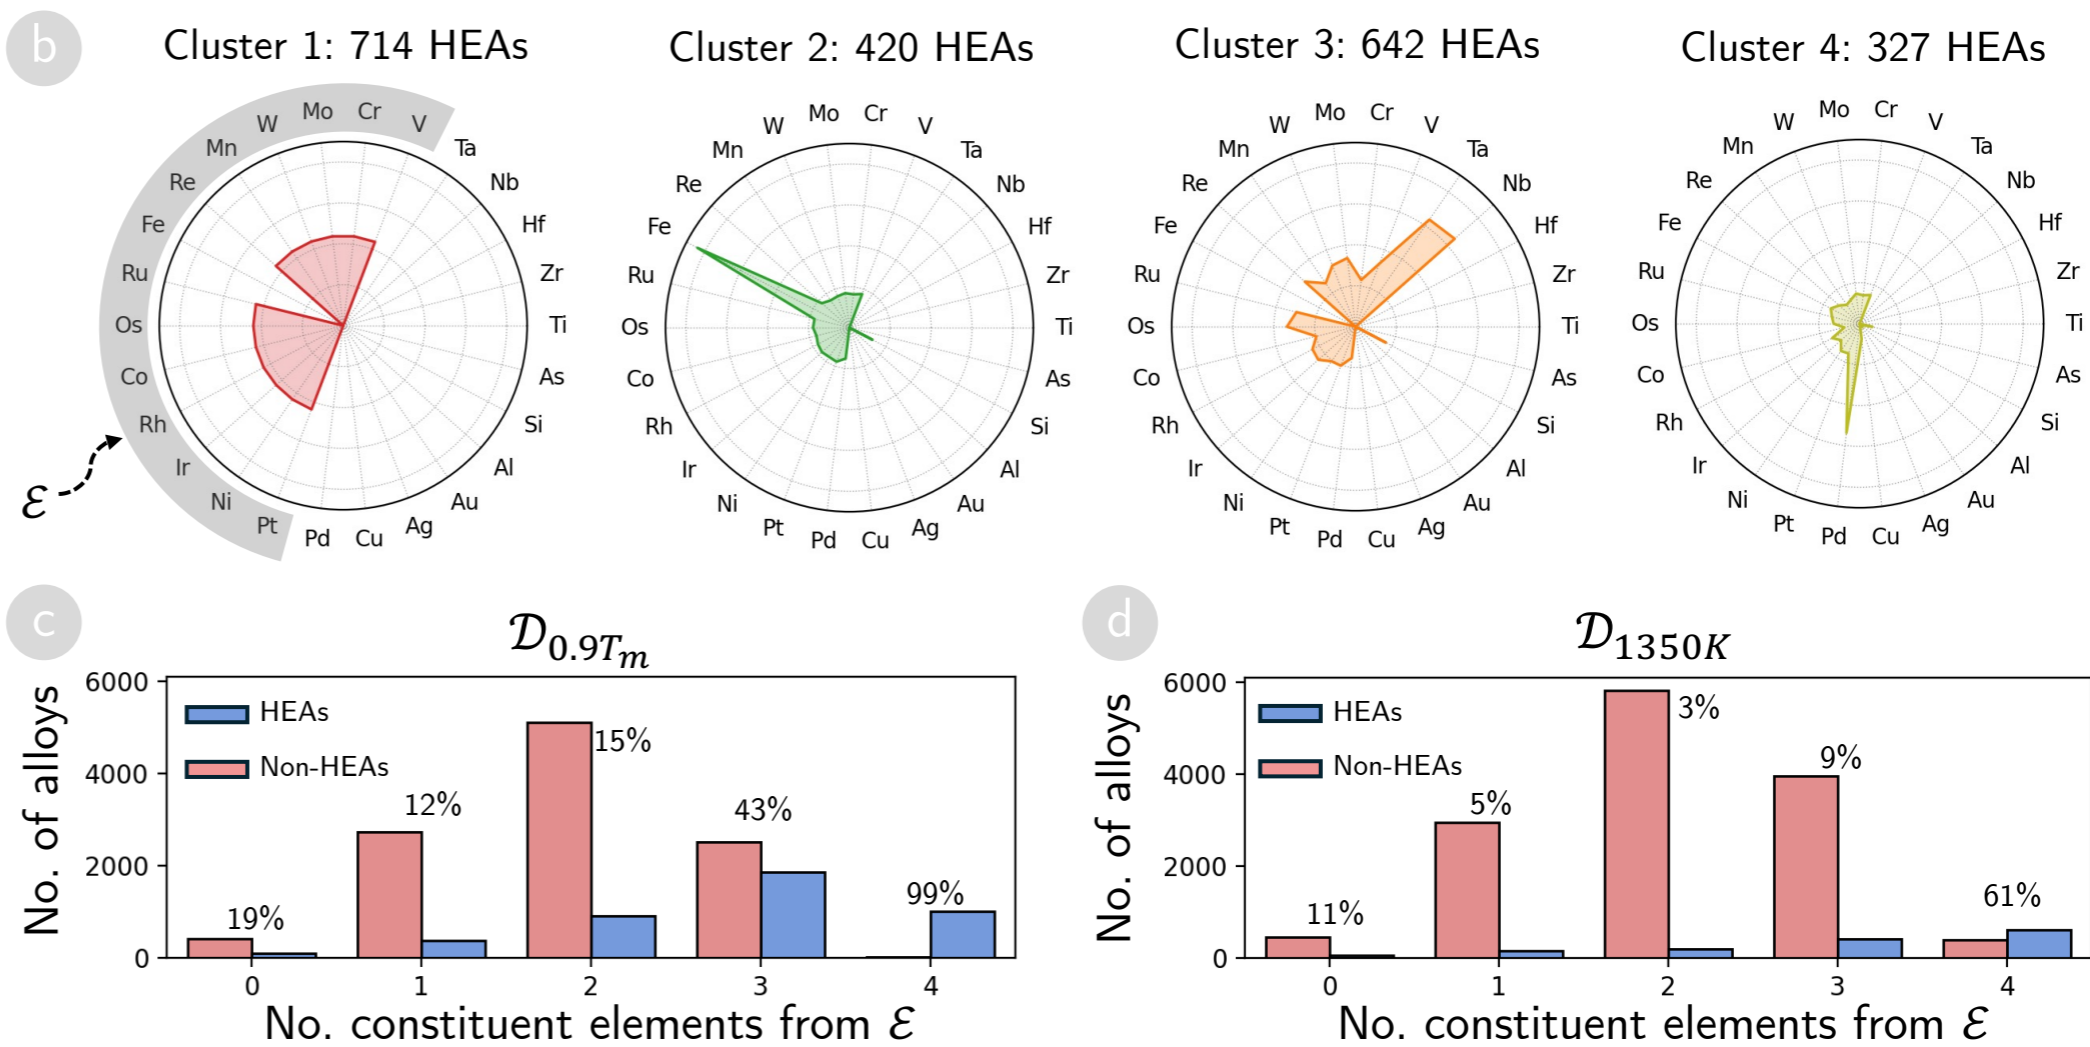

Supplement: d5dd00400d6.pdf [file d5dd00400d6.pdf]

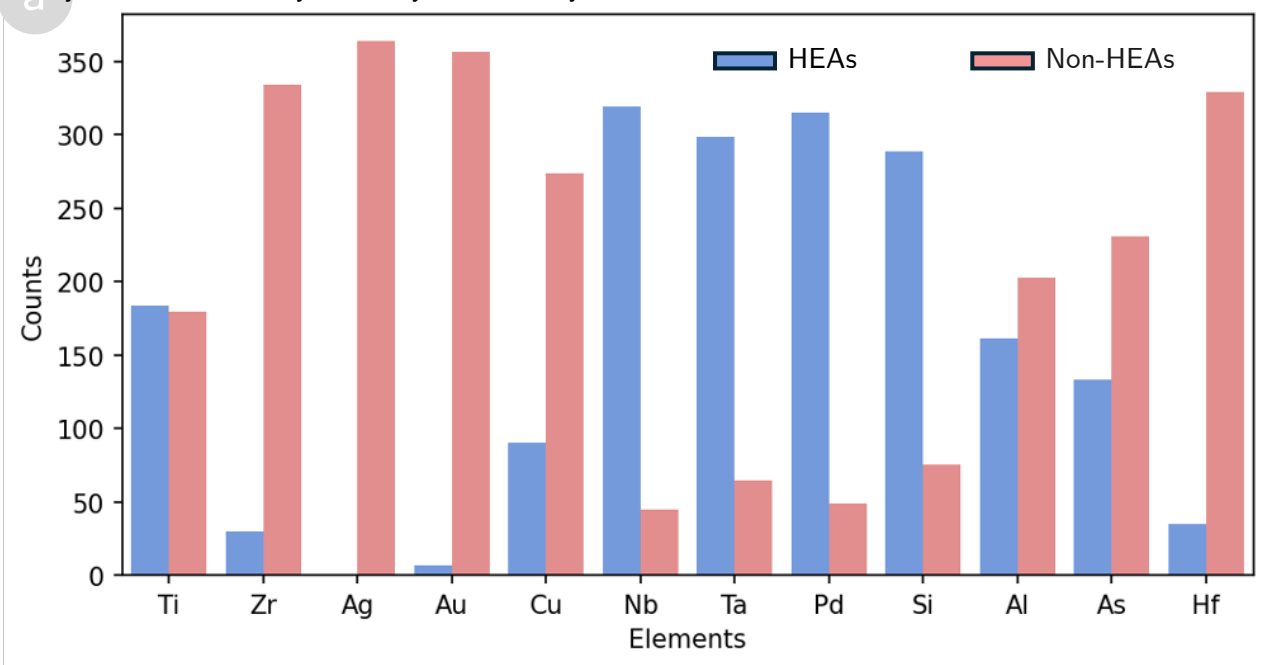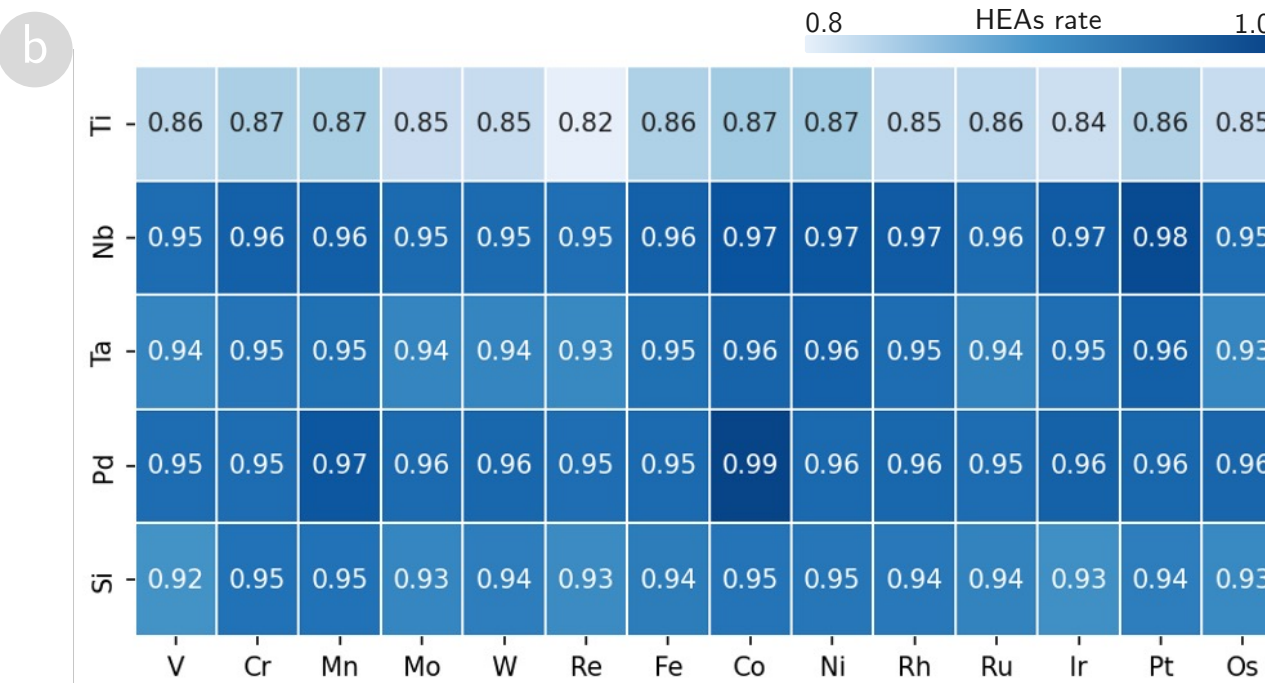

Supplement: d5dd00400d7.pdf [file d5dd00400d7.pdf]

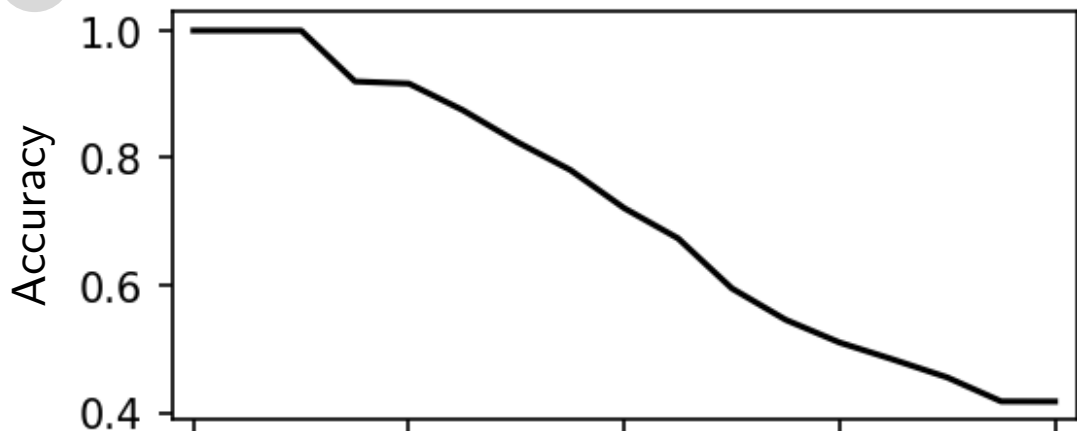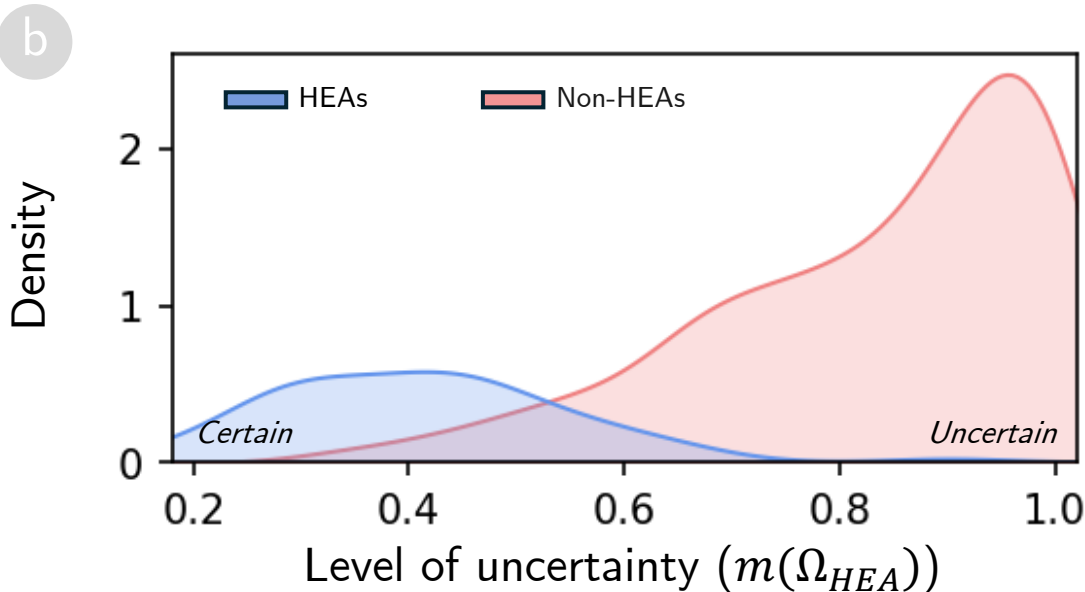

Supplement: d5dd00400d8.pdf [file d5dd00400d8.pdf]
